# Supplementary material for: Experience, Attitude, and Perceived Barriers Toward Research Among Ophthalmology Residents in Saudi Arabia: A National Cross-Sectional Study
Source: Research Square preprint supplement (doi:10.21203/rs.3.rs-111601/v1), 2020-12-03
Supplement: Supplementary file 1 [file 331e9d6f4fa90968e7e89a03.docx]

Appendix 1

Experience, Attitude, and Perceived Barriers Toward Research Among Ophthalmology Residents in Saudi Arabia: A National Cross-Sectional Study

**Author’s names**

1. **Ali A Al Saeed**- Medical intern at King Faisal University.
   - Telephone +966541444922, E.mail: [ali.2009.s@hotmail.com](mailto:ali.2009.s@hotmail.com).
2. **Mohanna Aljindan, MD**
   Department of Ophthalmology, college of medicine, Imam Abdulrahman Bin Faisal University
   P.O. Box 1982 , Dammam, Saudi Arabia
   Telephone +966505841216, E-mail: [drmohanna@yahoo.com](mailto:drmohanna@yahoo.com)
3. **Saad H. AlEnezi, MD**
   Department of Ophthalmology, Majmaah University,  P.O. Box 66, Majmaah 11952, Saudi Arabia. Telephone: +966505193388, E-mail: dr.saadhamdan@gmail.com
4. **Fahad Alwadani, MD**
   Faculty of Ophthalmology, College of Medicine, King Faisal University. Al-Ahsa, Saudi Arabia.
   Telephone : +966555939366, E-mail: [Dr_wadani@yahoo.com](mailto:Dr_wadani@yahoo.com),
5. **Adi Mohammed Al Owaifeer, MD
   - corresponding author.**Faculty of Ophthalmology, College of Medicine, 1.King Faisal University. Al-Ahsa, Saudi Arabia. 2. King Khaled Eye Specialist Hospital. Riyadh, Saudi Arabia.
   Faculty of Ophthalmology, College of Medicine, King Faisal University. P.O. Box 400, Al-Ahsa 31982, Saudi Arabia. Fax: +966135800820. Telephone: +966135895777. E-mail: aalowaifeer@kfu.edu.sa

***Content of the questionnaire.***

1. ***Details of all demographic data including:-***
   - - - **Age, Gender, Marital Status, Income, Level of Residency, Training Center.**
2. ***Baseline details and research experience of participants.***

**Have you ever worked on a research project?**

- Yes
- No

**What was/were your contribution/s?** [tick all options that apply]

- Concept and design
- Drafting a proposal
- Data collection
- Data analysis
- Manuscript writing
- Publication

**The methodology employed during Undergraduate/ Postgraduate research.** [tick all options that apply]

- Experimental
- RCT
- Cohort study
- Cross-sectional study
- Qualitative study
- Other

**Data collection site** [tick all options that apply]

- Tertiary
- District
- Multi-center
- Other

**Timing of project** [tick all options that apply]

- Retrospective
- Prospective
- Mixed
- Unknown

**Funding available for your project/s.**[tick all options that apply]

- - - - Self-funding
      - External funding
      - Never worked in funded project.

**Have you published any research project/s before?**

- - - - No
      - Yes

**If you have, then how many research project have you publish?**

(……….)

1. **Perceived barriers**

To which extent you would agree or disagree with the following statements as barriers toward research participation.

**Please notice:**

5 = (strongly agree), 4 = (Agree), 3 = (Natural), 2 = (disagree), 1 = (strongly disagree)

| 1. Lack of personal interest. |
| --- |
| 1. Lack of education in research. |
| 1. Lack of research skills. |
| 1. The burden of other educational activities (e.g. exams) |
| 1. Lack of proficiency in English. |
| 1. Inability to recognize areas of research |
| 1. Unfamiliarity with the acceptance criteria and published articles in various journals |
| 1. No observed effect of the results of research activities in clinical practice. |
| 1. Lack of research culture in my society. |
| 1. Lack of mentors and senior supervisors. |
| 1. Lack of research projects conducted by the department / Research is not a priority in my department. |
| 1. Lack of protected time allotted to research |
| 1. Lack of funds for research. |
| 1. Too much red tape in obtaining ethical approvals. |

To which extent you would agree or disagree with the following statements.

**Please notice:**

5 = (strongly agree), 4 = (Agree), 3 = (Natural), 2 = (disagree), 1 = (strongly disagree)

1. **Attitude toward research**

| 1. Research is an asset to a fellowship/senior residency position application. |
| --- |
| 1. Research is an important component of ophthalmology residency and clinical training. |
| 1. Research improves clinical proficiency and quality of patient care. |
| 1. Research develops essential skills for lifelong learning. |
| 1. Research develops critical thinking. |
| 1. Research allows the advancement of scientific/medical knowledge and education. |
| 1. Research facilitates training of residents to be clinician investigators/scientists. |

1. **Which of the following recommendations would recommend to optimize the research environment in your training center?** [**Tick all that apply] ***

| 1. Supervisors need to be more aware and committed to the projects. |
| --- |
| 1. More time needs to be given to do the research project. |
| 1. Research project must be mandatory for promotion during residency. |
| 1. Training centers should facilitate access to scientific journals. |
| 1. Training centers should provide specific budget for residents’ research funds. |
| 1. Providing intensive workshops in research skills, manuscript writing and biostatistics. |
| 1. Training centers must hire dedicated research faculties to facilitate residents’ postgraduate research. |
| 1. Arranging forums to present residents research such as conferences, symposium and research day. |

1. **If you would like to suggest or recommend anything additional for optimizing the research environment in your training center, please type it below. [Optional].
   (__________________________________________________________________)**
